# Supplementary material for: Identification of Novel Susceptibility Loci for Kawasaki Disease in a Han Chinese Population by a Genome-Wide Association Study
Source: PubMed Central journal article supplement (PMC3033903; doi:10.1371/journal.pone.0016853), 2011-02-04
Supplement: pone.0016853.s006.pdf [file pone.0016853.s006.pdf]

**Table S1. Quality control of participant data.**

---

|                       |              |
|-----------------------|--------------|
| Number at start of QC | 906,545 SNPs |
|-----------------------|--------------|

---

Number dropped during exclusion step:

|                                                                               |             |
|-------------------------------------------------------------------------------|-------------|
| Non-polymorphic in cases & controls                                           | 96,955 SNPs |
| Overall call rate < 95%                                                       | 27,779 SNPs |
| Overall MAF < 5% & total call rate < 99%                                      | 30,080 SNPs |
| SNPs with HWE for controls ( $p < 10^{-7}$ ) & no non-polymorphic in controls | 28,093 SNPs |

---

|                     |              |
|---------------------|--------------|
| Number at end of QC | 723,638 SNPs |
|---------------------|--------------|

---
