# Supplementary material for: Identification of Novel Susceptibility Loci for Kawasaki Disease in a Han Chinese Population by a Genome-Wide Association Study
Source: PubMed Central journal article supplement (PMC3033903; doi:10.1371/journal.pone.0016853), 2011-02-04
Supplement: pone.0016853.s007.pdf [file pone.0016853.s007.pdf]

**Table S2. Demographic and clinical characteristics of participants in the GWAS and replication study.**

| Characteristics                 | Genome-Wide Association Cohort | Follow-up Cohort |
|---------------------------------|--------------------------------|------------------|
| Cases (% male)                  | 250 (62.4%)                    | 208 (68.3%)      |
| Control (% male)                | 446 (52.9%)                    | 366 (41.3%)      |
| Coronary artery abnormality (%) | 88/250 (35.2%)                 | 52/208 (25%)     |
| (% male)                        | 65/88 (73.86%)                 | 35/52 (67.31%)   |
