# Supplementary material for: Identification of Novel Susceptibility Loci for Kawasaki Disease in a Han Chinese Population by a Genome-Wide Association Study
Source: PubMed Central journal article supplement (PMC3033903; doi:10.1371/journal.pone.0016853), 2011-02-04
Supplement: pone.0016853.s008.pdf [file pone.0016853.s008.pdf]

**Table S3. Association results and concordance rates for validated, significantly associated SNPs in the initial cohort, and association results from the replication study.**

| Chr | SNP        | Cytoband | Allele | concordance |          | pbest    |          |
|-----|------------|----------|--------|-------------|----------|----------|----------|
|     |            |          |        | rates       | Stage 1  | Stage 2  | Join     |
| 1   | rs12751986 | p36.12   | AG     | 99.67       | 3.24E-05 | 3.82E-02 | 3.05E-03 |
| 1   | rs3117048  | p36.12   | CT     | 100         | 7.59E-05 | 3.39E-01 | 7.25E-04 |
| 1   | rs771401   | p34.3    | AG     | 100         | 7.23E-05 | 2.85E-01 | 1.31E-03 |
| 1   | rs880017   | p34.3    | AG     | 100         | 8.71E-05 | 1.42E-01 | 2.07E-04 |
| 1   | rs4142781  | p31.1    | CT     | 100         | 3.22E-05 | 1.87E-01 | 6.91E-03 |
| 2   | rs13391405 | p14      | CT     | 100         | 9.50E-05 | 4.10E-02 | 1.07E-01 |
| 2   | rs1375373  | p14      | CG     | 99.84       | 2.60E-05 | 1.25E-01 | 1.00E-01 |
| 2   | rs560737   | p12      | AG     | 100         | 2.79E-05 | 1.46E-01 | 6.65E-03 |
| 2   | rs410532   | p12      | AG     | 99.51       | 5.05E-05 | 1.28E-01 | 2.72E-02 |
| 2   | rs53915    | p12      | AG     | 99.84       | 6.45E-05 | 1.28E-01 | 1.89E-02 |
| 2   | rs7606753  | q35      | AG     | 100         | 8.54E-05 | 5.17E-02 | 2.16E-04 |
| 3   | rs1873666  | q23      | CT     | 99.84       | 1.84E-05 | 3.70E-01 | 1.23E-04 |
| 3   | rs4894410  | q23      | CG     | 100         | 7.90E-05 | 1.87E-01 | 1.03E-04 |
| 3   | rs1873668  | q23      | AC     | 100         | 3.68E-05 | 2.22E-01 | 9.52E-05 |
| 3   | rs4243399  | q23      | AG     | 100         | 3.82E-05 | 2.22E-01 | 9.93E-05 |
| 3   | rs16849065 | q23      | AG     | 99.84       | 7.90E-05 | 3.23E-01 | 2.43E-04 |
| 3   | rs16849083 | q23      | AG     | 99.84       | 3.46E-05 | 3.17E-01 | 2.19E-05 |
| 4   | rs4833167  | q27      | GT     | 100         | 2.42E-05 | 1.10E-01 | 2.94E-04 |
| 4   | rs13128867 | q28.3    | CT     | 99.84       | 7.42E-05 | 4.16E-02 | 2.23E-05 |
| 4   | rs4863532  | q28.3    | AG     | 99.84       | 6.09E-05 | 7.62E-01 | 5.01E-02 |
| 5   | rs149481   | q15      | GT     | 100         | 2.25E-05 | 2.72E-01 | 4.61E-05 |
| 5   | rs27042    | q15      | AG     | 100         | 6.53E-05 | 4.26E-02 | 1.53E-04 |
| 5   | rs678591   | q35.2    | GT     | 99.84       | 6.04E-05 | 5.84E-01 | 6.40E-04 |
| 5   | rs17601481 | q35.2    | CT     | 99.84       | 3.64E-05 | 6.57E-01 | 2.95E-04 |
| 5   | rs6875659  | q35.2    | AG     | 100         | 3.46E-05 | 1.88E-01 | 2.71E-02 |
| 6   | rs238050   | p25.3    | CT     | 100         | 6.15E-05 | 1.76E-02 | 2.83E-03 |
| 6   | rs9365775  | q27      | AG     | 99.84       | 7.63E-05 | 3.30E-01 | 3.27E-03 |
| 6   | rs1511085  | q27      | CT     | 100         | 7.11E-05 | 4.19E-01 | 3.13E-03 |
| 7   | rs362794   | q22.1    | AG     | 100         | 4.41E-06 | 3.05E-01 | 3.03E-05 |

|    |            |        |    |       |          |          |          |
|----|------------|--------|----|-------|----------|----------|----------|
| 9  | rs6477140  | p24.1  | CT | 100   | 5.49E-05 | 3.34E-01 | 3.42E-04 |
| 9  | rs303751   | p22.3  | CT | 99.52 | 9.80E-05 | 7.74E-02 | 1.35E-03 |
| 9  | rs913417   | p22.3  | AG | 100   | 7.85E-05 | 2.85E-01 | 4.61E-04 |
| 9  | rs1464666  | q31.1  | AC | 99.67 | 3.19E-05 | 4.02E-01 | 1.01E-02 |
| 10 | rs657497   | q25.3  | AG | 99.52 | 1.77E-05 | 3.84E-01 | 1.69E-04 |
| 10 | rs2616657  | q25.3  | AG | 99.5  | 8.98E-05 | 3.00E-01 | 3.28E-03 |
| 10 | rs642602   | q25.3  | AG | 99.84 | 5.12E-05 | 2.97E-01 | 6.78E-04 |
| 12 | rs11048538 | p11.23 | CT | 100   | 6.27E-05 | 6.96E-01 | 1.52E-03 |
| 12 | rs11048543 | p11.23 | AG | 100   | 6.97E-05 | 6.96E-01 | 1.79E-03 |
| 12 | rs11104677 | q21.32 | AG | 100   | 7.82E-05 | 5.43E-01 | 9.61E-03 |
| 12 | rs12423537 | q21.32 | AC | 100   | 9.79E-05 | 4.86E-01 | 1.35E-03 |
| 13 | rs9318846  | q31.1  | CT | 100   | 3.57E-05 | 3.60E-01 | 9.76E-04 |
| 13 | rs9318847  | q31.1  | AT | 100   | 3.44E-05 | 3.60E-01 | 9.77E-04 |
| 13 | rs9531328  | q31.1  | AG | 100   | 3.57E-05 | 3.60E-01 | 9.76E-04 |
| 14 | rs848035   | q13.3  | CT | 99.84 | 9.50E-05 | 1.00E-01 | 3.77E-03 |
| 14 | rs848034   | q13.3  | CT | 94.71 | 6.67E-05 | 1.76E-01 | 4.25E-03 |
| 14 | rs17113284 | q32.33 | CT | 100   | 7.22E-05 | 2.52E-02 | 1.08E-05 |
| 14 | rs8005468  | q32.33 | CT | 99.84 | 7.98E-05 | 2.34E-02 | 8.93E-06 |
| 14 | rs10129255 | q32.33 | AG | 99.84 | 5.17E-05 | 2.19E-02 | 1.14E-05 |
| 14 | rs2007467  | q32.33 | AG | 99.84 | 4.66E-05 | 3.54E-02 | 1.28E-05 |
| 14 | rs10150241 | q32.33 | AT | 99.84 | 5.73E-05 | 3.06E-02 | 1.08E-05 |
| 14 | rs12590667 | q32.33 | AG | 99.52 | 4.81E-05 | 3.90E-02 | 1.27E-05 |
| 15 | rs11259948 | q25.2  | CG | 99.84 | 6.50E-05 | 1.13E-01 | 1.22E-02 |
| 15 | rs1568657  | q25.2  | AG | 99.84 | 8.69E-05 | 3.04E-02 | 6.61E-06 |
| 17 | rs11655647 | p13.1  | CT | 100   | 4.82E-05 | 3.47E-01 | 1.13E-02 |
| 18 | rs6507234  | q12.2  | AG | 100   | 6.05E-05 | 4.97E-01 | 4.23E-03 |
| 19 | rs4390710  | q13.2  | CT | 100   | 8.73E-05 | 1.87E-01 | 9.56E-03 |
| 19 | rs2353678  | q13.2  | CG | 100   | 8.73E-05 | 1.24E-01 | 9.56E-03 |

$P_{best}$ -values indicate the minimal  $p$ -value of the five association tests: genotype, allele, trend, dominant, and recessive.

The 13 SNPs with association  $p$ -values less than  $10^{-4}$  in the joint analysis are highlighted in gray.
